# Supplementary material for: Visualizing mechanical modulation of nanoscale organization of cell-matrix adhesions
Source: Royal Society of Chemistry journal article supplement (doi:10.1039/c6ib00031b), 2016-01-01
Supplement: c6ib00031b1.pdf [file c6ib00031b1.pdf]

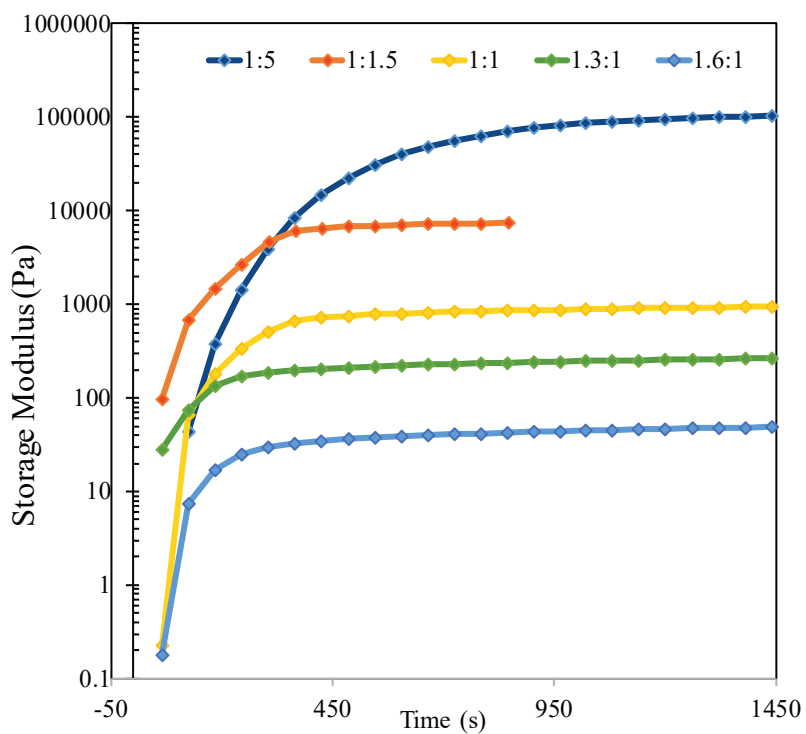

Supplemental Figure 1. Curing test of different monomer to crosslinker ratios at 60°C, with constant shear deformation at frequency of 1Hz. Measurements were taken every 60 seconds.
